# Supplementary material for: Enhancement of performance in porous bead-based microchip sensors: effects of chip geometry on bio-agent capture
Source: Royal Society of Chemistry journal article supplement (doi:10.1039/c5ra07910a), 2015-01-01
Supplement: c5ra07910a1.pdf [file c5ra07910a1.pdf]

SUPPORTING INFORMATION FOR C5RA07910A

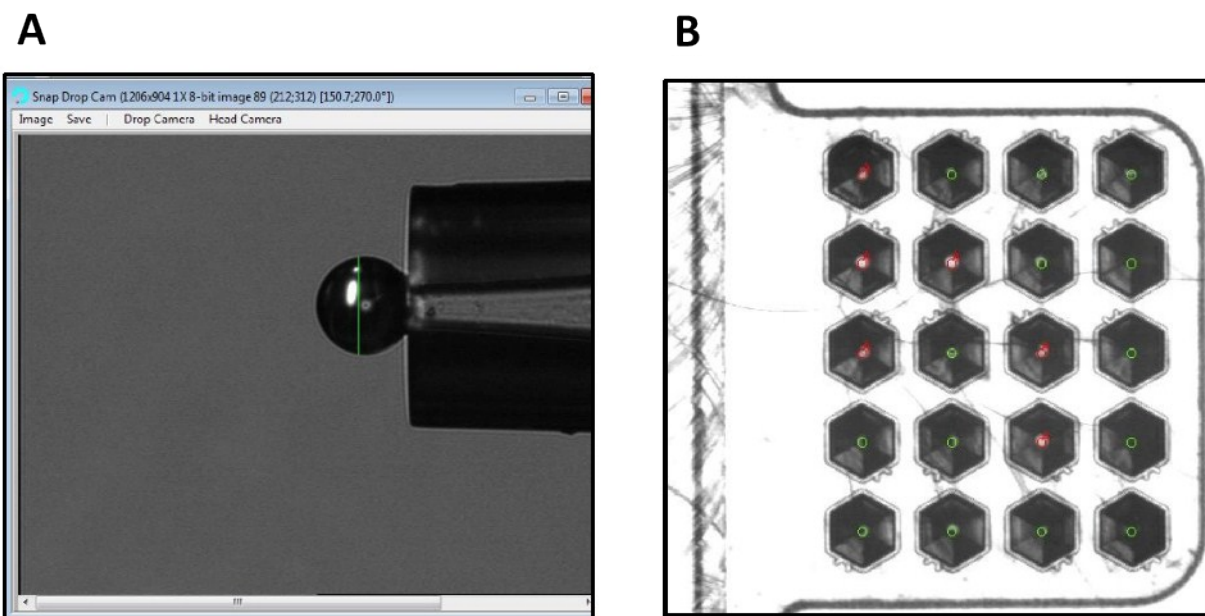

**Fig. S1** Bead placement using custom-built piezoelectrically-actuated ejectors by Scienion, AG (Berlin, Germany). **(A)** Microbead, 150  $\mu\text{m}$  in diameter, attached to the nozzle tip. **(B)** Head camera image and software provide quality control of the bead-placement by indicating filled (green circles) and not filled (red circles) micro-wells.

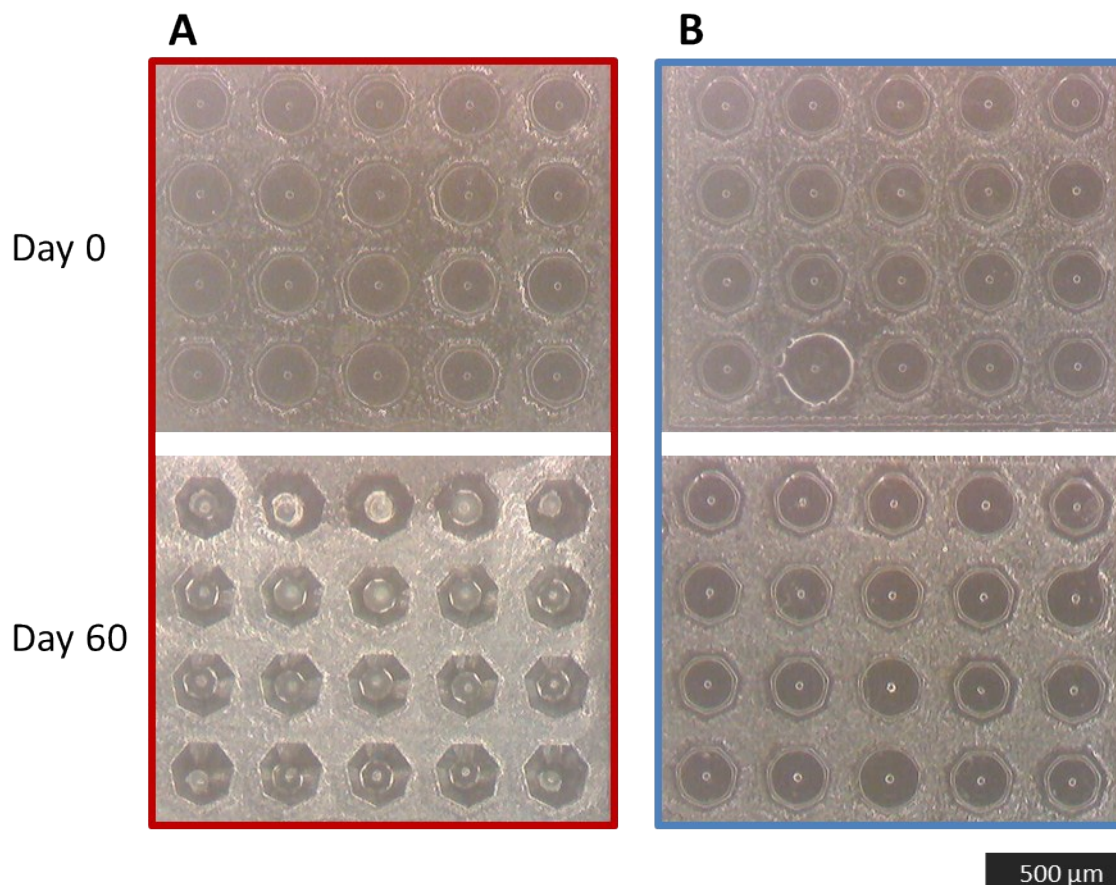

**Fig. S2** Optical micrographs of agarose beads stored in a  $4 \times 5$  microchip array in solutions of **(A)** PBS buffer and **(B)** glycerol. While agarose beads stored in PBS buffer dry out, the structural integrity of the beads stored in glycerol is maintained for up to 60 days.

**Table S1:** Summary of CV% ranges for experiments involving fluorescently-labeled CRP in Fig. 4

| Experiment  | Intra-assay CV% |            | Inter-assay CV% |            |
|-------------|-----------------|------------|-----------------|------------|
|             | PF              | CPF        | PF              | CPF        |
| Time course | 2.9 – 7.8       | 3.7 – 10.2 | 2.1 – 5.9       | 3.9 – 13.1 |
| Flow rate   | 1.3 – 13.7      | 3.2 – 8.3  | 2.9 – 15.7      | 2.7 – 16.1 |
